# Supplementary material for: Characterization of zein assemblies by ultra-small-angle X-ray scattering
Source: Royal Society of Chemistry journal article supplement (doi:10.1039/c6sm02717b), 2017-01-01
Supplement: c6sm02717b1.pdf [file c6sm02717b1.pdf]

## SUPPORTING INFORMATION

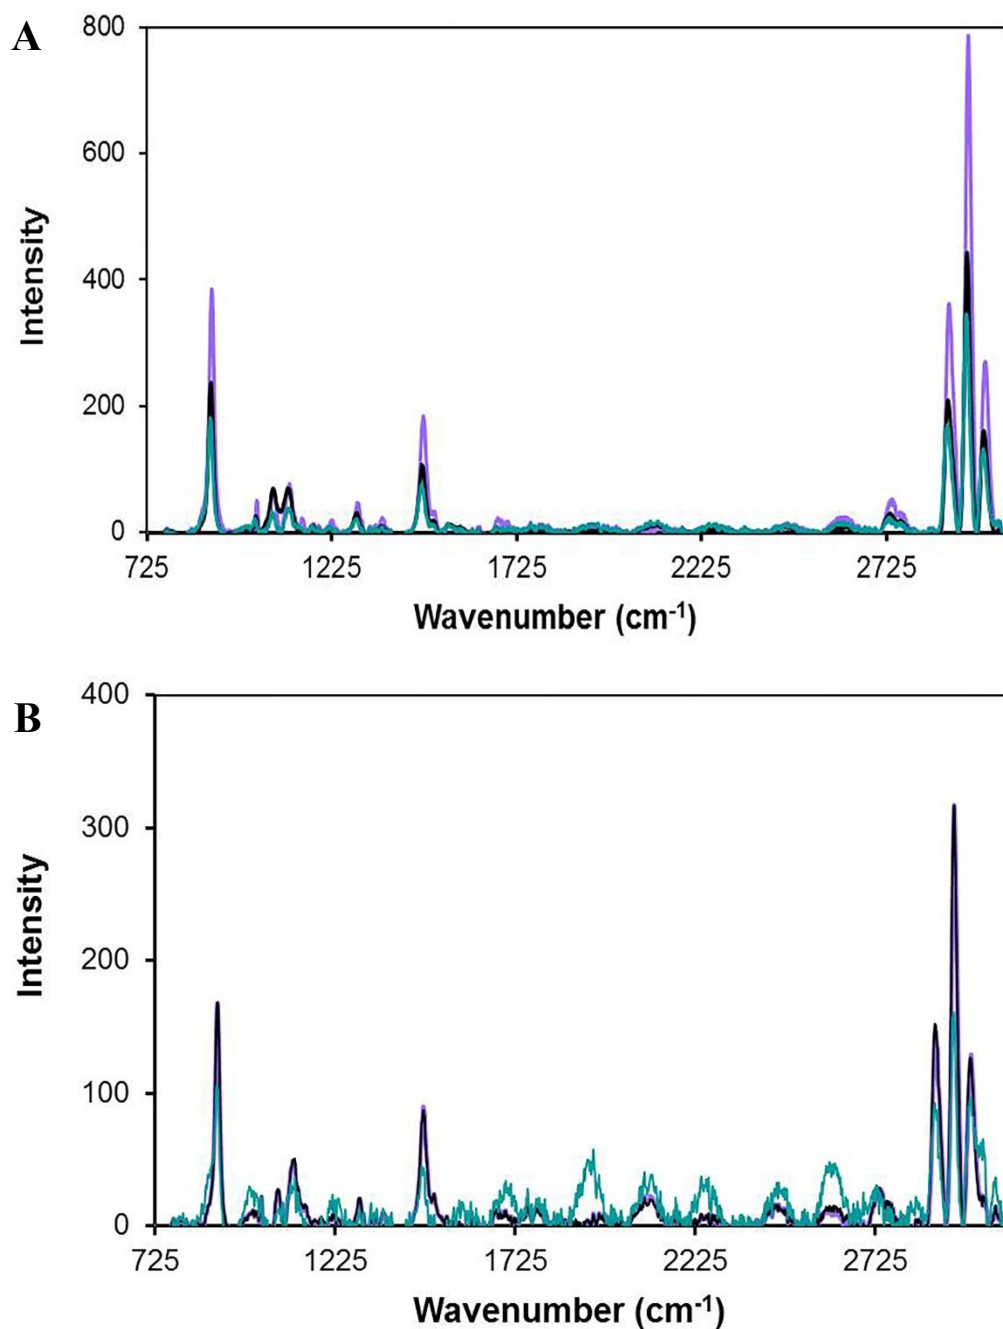

**Figure S1.** Raman spectra of a) freshly prepared and b) aged 30% zein in 70% ethanol (purple), 80% ethanol (black), 90% ethanol (green).
